# Supplementary material
Source: publisher figshare collection journal article supplement (https://karger.figshare.com/articles/dataset/_/5121715)
Supplement: Supplementary file 1 [file 1 › 000324297_sm_Figure.pdf]

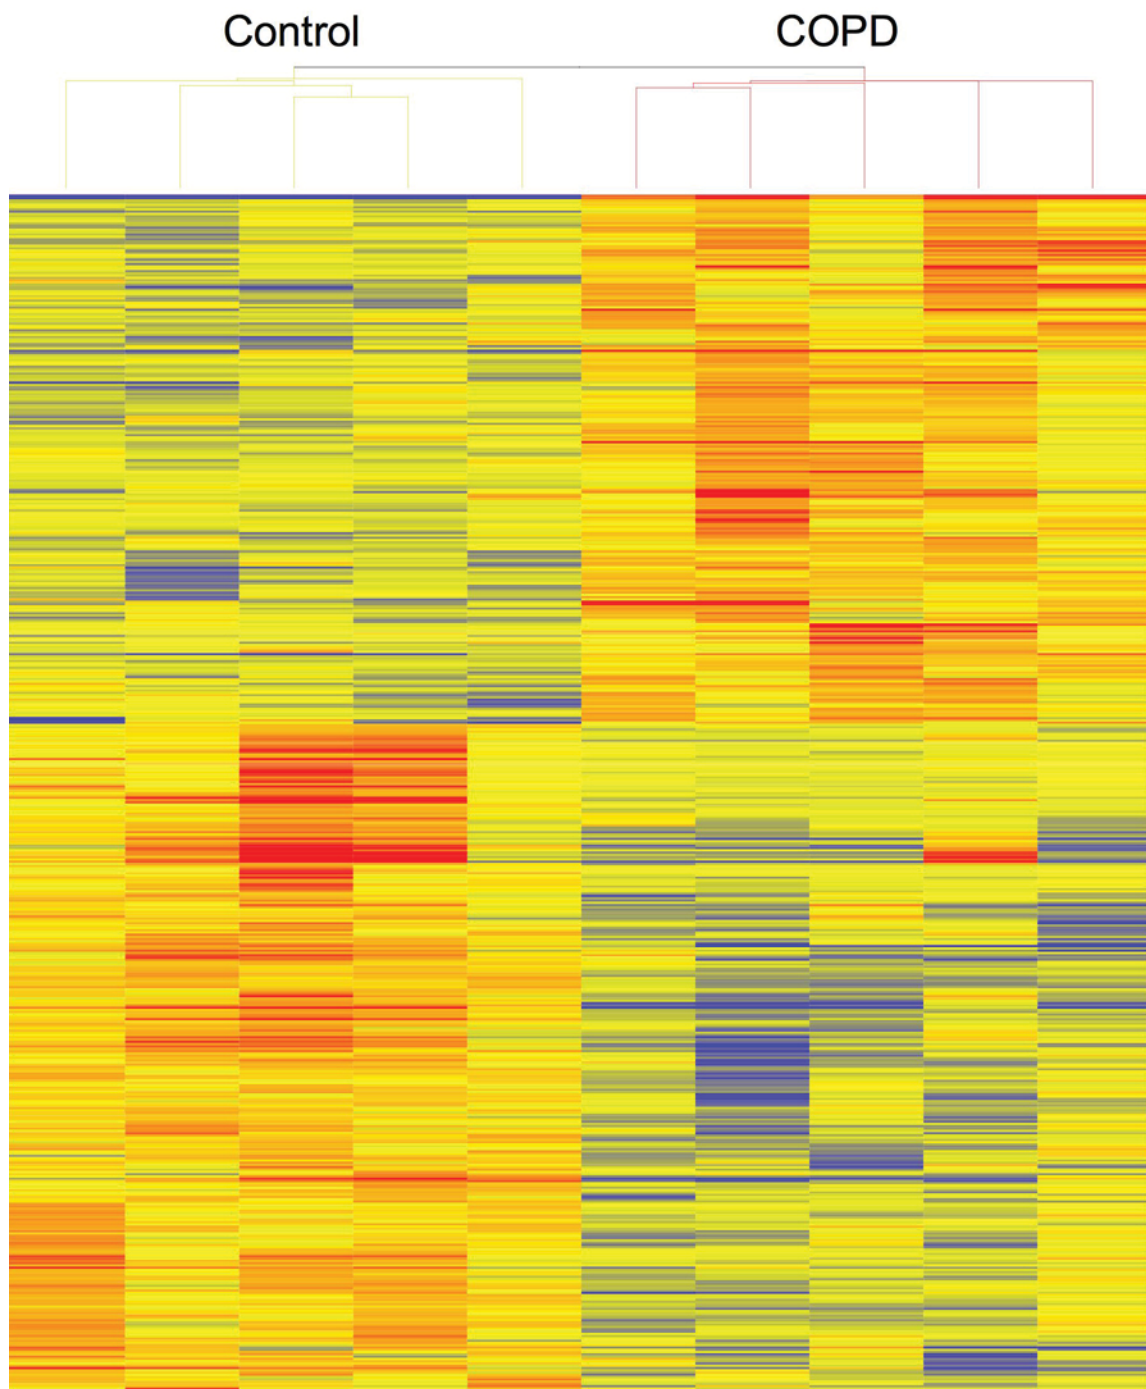

Figure S1. Hierarchical cluster analysis of COPD specific probe sets 671 probe sets (representing 389 annotated genes) showed significant differences between healthy control and COPD patients in the AM microarray analysis. Unsupervised hierarchical cluster analysis was performed on this list using Pearson correlation. These probe sets completely separated the healthy and diseased group.
